# Supplementary material for: Proteomic and Crotonylomic Integration of a Self-Established IgA Nephropathy Cohort Reveals Dysregulated Secretory Proteins and Immune Cell Regulators
Source: Research Square preprint supplement (doi:10.21203/rs.3.rs-7901738/v1), 2025-11-11
Supplement: Supplementary file 1 [file 717a7d172d6d2f8e5c0ce02c.xlsx]

## Sheet: Sheet1
TFs
ATF2
BRD4
CBFB
CEBPA
CEBPB
CTCF
E2F1
EBF1
EP300
ERG
FLI1
HDAC2
IRF4
LMO2
MTA3
MYB
NFIC
PAX5
POLR2A
RUNX1
RUNX1T1
RUNX3
SP1
SPI1
SPIB
STAG1
STAT1
TAL1
TCF12
TCF3
TFAP4
BRD3
ELF1
EPAS1
GATA1
GATA2
GATA3
IRF1
KLF1
MAX
MAZ
MYH11
PML
RARA
RELA
TAF1
TCF7L2
YY1
ETS1
BATF
BCL11A
BCL6
CDK9
FOXM1
JUND
MED1
MEF2A
MYC
NCOR1
NCOR2
NFATC1
POU2F2
RAD21
RXRG
STAT5A
GABPA
PPARG
ZNF384
FOXP1
TP53
ATRX
HDAC1
NFYB
PBX3
POU2F1
RFX5
STAT5B
ZEB1
BHLHE40
CDK7
CTBP2
E2F4
EGR1
STAT4
ATF3
BACH2
BCL3
CREB1
CREBBP
FOS
MXI1
NFE2
NFYA
REST
SRF
TBL1XR1
USF1
USF2
VDR
ZNF143
ESRRA
GLIS1
SMC3
MAFK
SMAD1
